# Supplementary material for: p53-repressed miRNAs are involved with E2F in a feed-forward loop promoting proliferation
Source: PubMed Central journal article supplement — Mol Syst Biol. 2008 Nov 25;4:229. doi: 10.1038/msb.2008.65 (PMC2600669; doi:10.1038/msb.2008.65), 2008-11-25
Supplement: msb200865-s1.pdf [file msb200865-s1.pdf]

## Table of Content

|                 |         |
|-----------------|---------|
| Figure S1 ..... | page 1  |
| Figure S2 ..... | page 3  |
| Figure S3 ..... | page 4  |
| Figure S4 ..... | page 6  |
| Figure S5 ..... | page 7  |
| Figure S6 ..... | page 9  |
| Table S1 .....  | page 10 |
| Table S2 .....  | page 11 |
| Table S3 .....  | page 12 |
| Table S4 .....  | page 14 |
| Table S5 .....  | page 15 |
| Table S6 .....  | page 19 |

# Figure S1

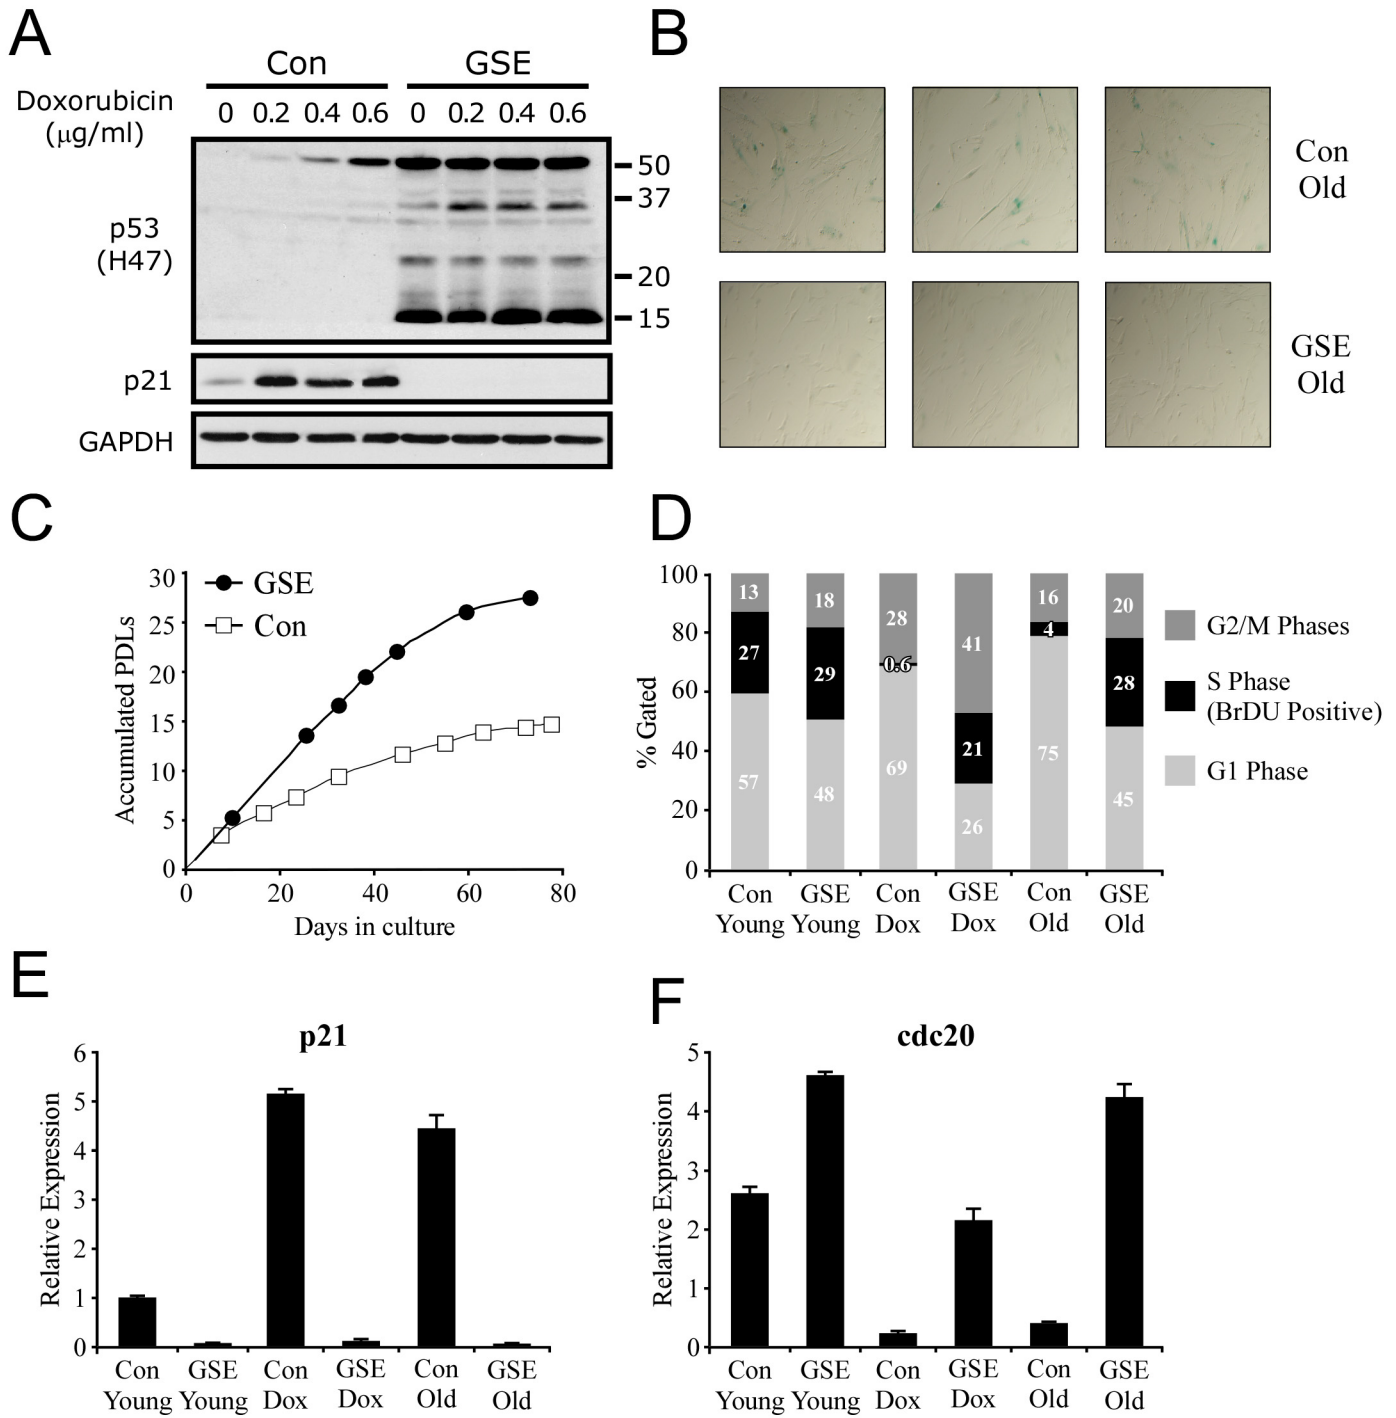

## Figure S1. Establishment of the WI-38 system.

WI-38 primary human fibroblasts were infected with a retrovirus encoding for the p53-inactivating peptide, GSE56. These cells (GSE) and their active p53 counterparts (Con) were treated with the DNA damaging agent doxorubicin as well as grown until the onset of replicative senescence. A. Western blot depicting p53 and p21 following doxorubicin treatment. p53 was stabilized and activated its target gene p21 in the NEO cells upon treatment. In the GSE cells, p53 was stabilized in its inactive form already at basal levels by GSE56, a 15 kDa peptide detected by the H-47 anti-p53 polyclonal antibody. The p21 protein was not detectable in the GSE cells at basal levels, nor was it induced upon DNA damage, indicating of a complete inactivation of p53 transactivation activity. B and C. Introduction of the GSE56 peptide at passage 20 resulted in accelerated growth rate (C) and delay in replicative senescence, as indicated by the reduction of senescence-associated  $\beta$ -galactosidase (SA- $\beta$ -Gal) staining (B). D. Cell cycle analysis demonstrates that both DNA damage and replicative senescence resulted in a sharp p53-dependent cell cycle arrest. E. QRT-PCR analyses of p21 mRNA levels demonstrated that p53 transactivation activity was significantly induced upon both DNA damage and replicative senescence, and was completely abolished by the introduction of GSE56. F. QRT-PCR analyses of *cdc20*, a p53-repressed gene that participates in cell-cycle progression. To conclude, we have generated an isogenic pair of primary human cell cultures that display p53-dependent cell cycle arrest, gene activation and repression, and senescence phenotypes upon application of p53-activating stress. Data are represented as mean  $\pm$  SD.

# Figure S2

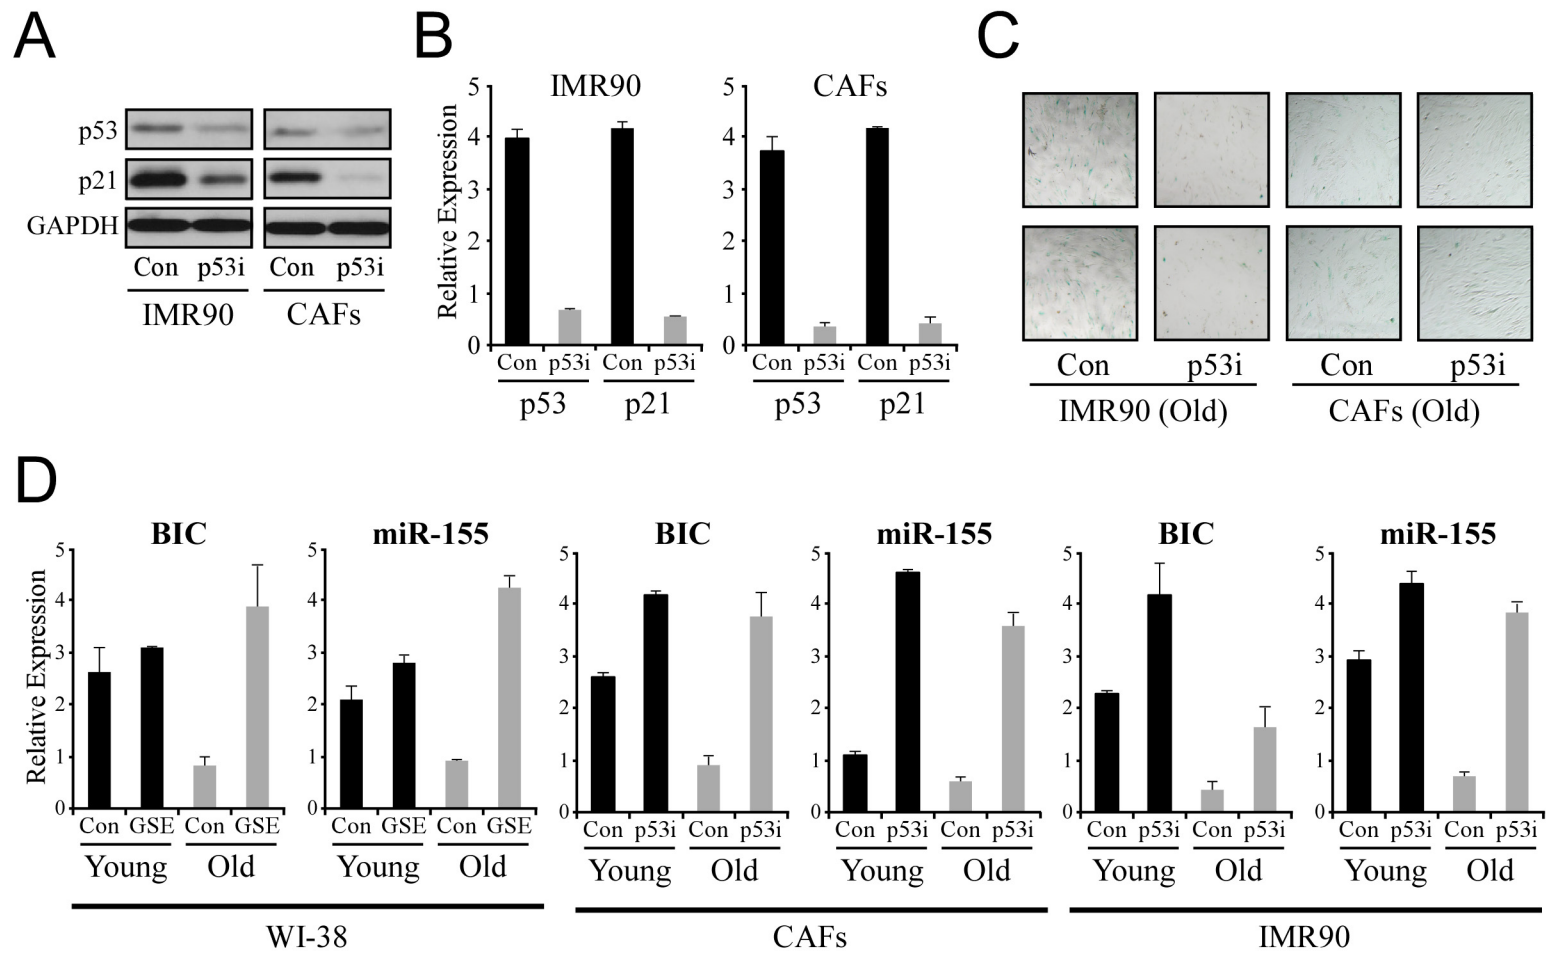

## Figure S2. Establishment of the IMR90 and CAFs systems.

Lung primary human fibroblasts IMR90 and prostate-cancer associated fibroblasts (CAFs) PFCA179 were infected with a retrovirus encoding for either a small hairpin RNA targeting p53 (p53i) or a control RNAi (Con), and grown until the onset of replicative senescence. A. A Western blot depicting p53 and p21 downregulation upon the stable expression of the p53 small hairpin RNA. B. QRT-PCR analyses of p53 and p21 mRNA levels. C. SA-β-Gal staining for late passage IMR90 and CAFs. D. QRT-PCR analysis for the non-coding RNA BIC and its resident miRNA miR-155 in WI-38, CAFs and IMR90 cells. Samples were collected from early passage cultures (Young) and from late passage cultures (Old). Data are represented as mean  $\pm$  SD.

# Figure S3

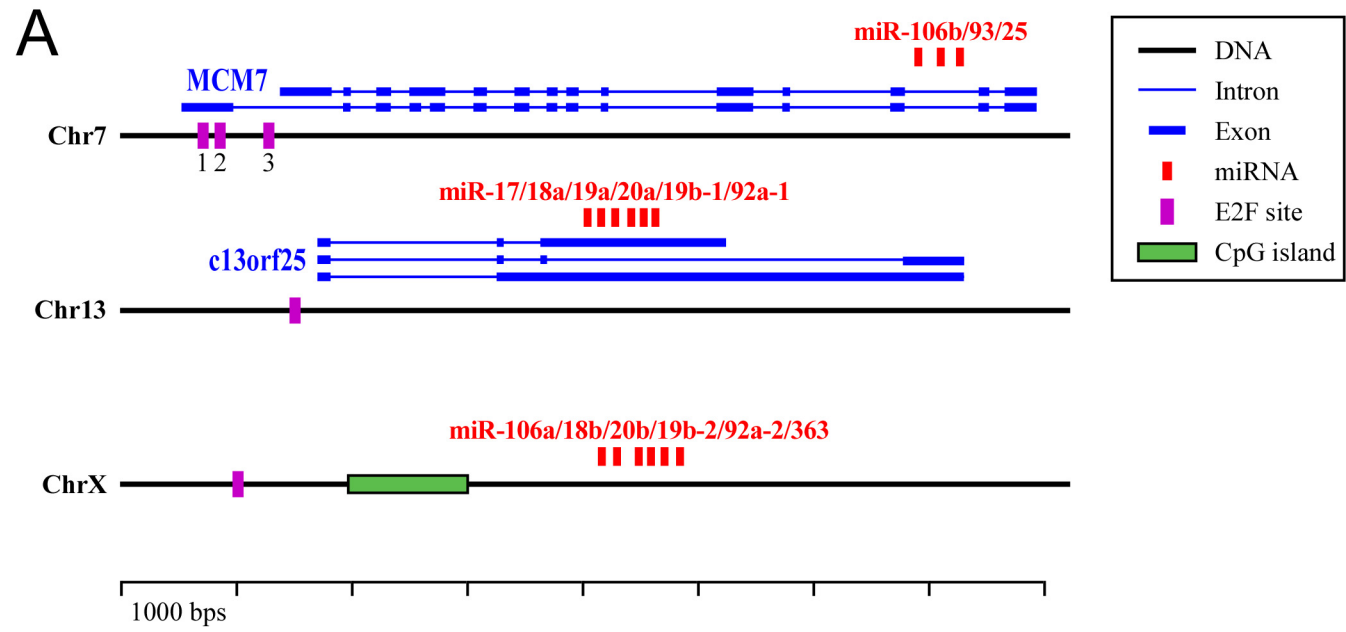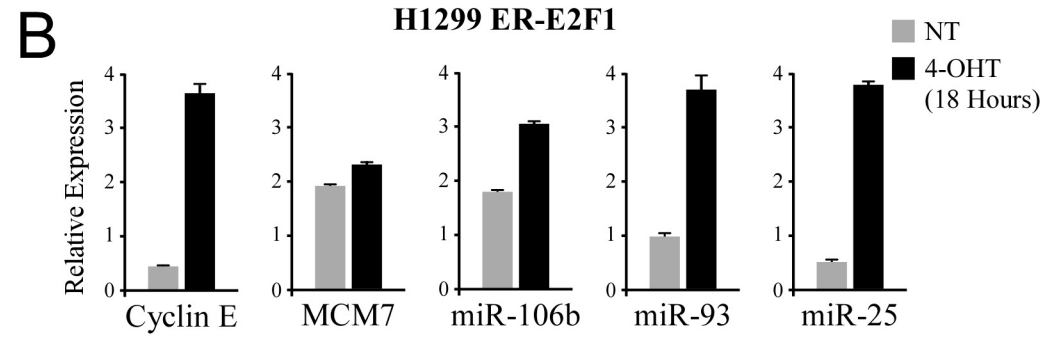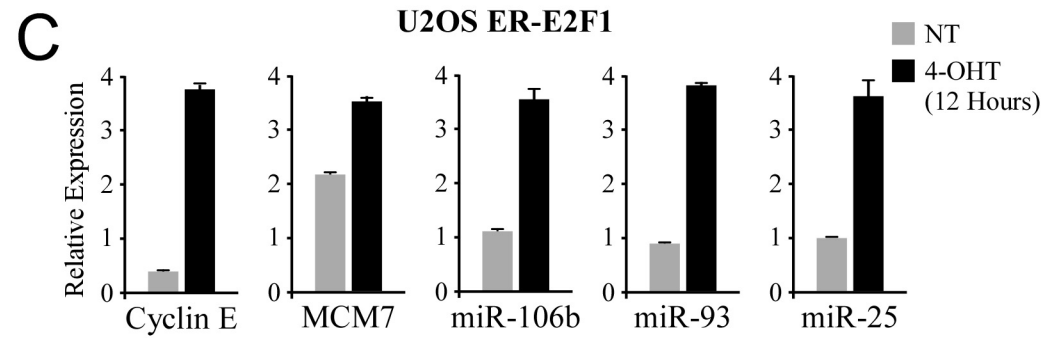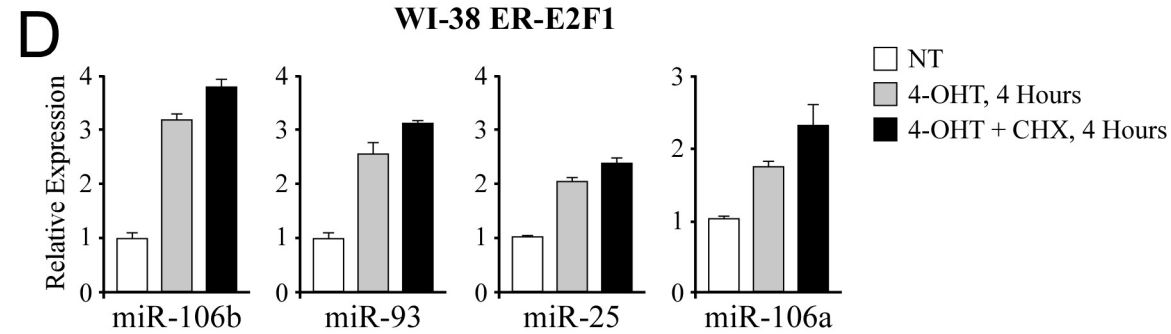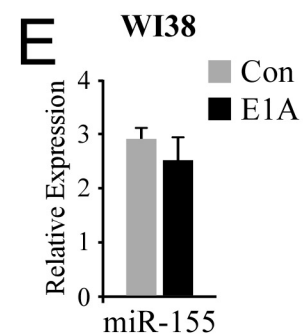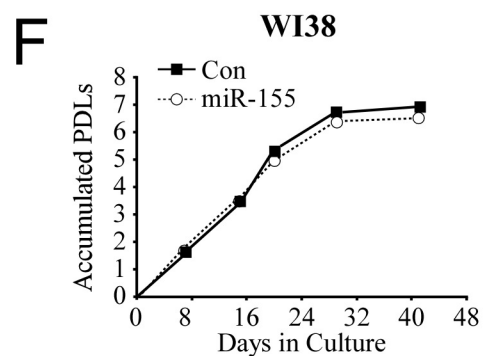

### **Figure S3. The cell-cycle associated polycistronic miRNAs are directly induced by E2F.**

A. Schematic representation of the genomic organization of the three paralogous polycistrons. Conserved E2F sites (according to the tfbsConsSites track from the UCSC database) are located upstream of each of the miRNA clusters. For the miR-106b-25 cluster, three E2F sites are found within 1kb upstream of MCM7 TSS. For miR-17-92 cluster, an E2F site is located 83 bps upstream of c13orf25 TSS. For miR-106a-92 cluster, which has no known host transcript, an E2F site is located upstream of a CpG island, indicative of a potential TSS in that region. ChIP analysis indicates binding of E2F1 to each of the E2F sites presented here (Fig. 4A). B and C. E2F induces the levels of miR-106b/93/25 polycistron. H1299 lung carcinoma cell line (A) and U2OS osteosarcoma cell line (B) were treated with 4-OHT for the indicated time periods. QRT-PCR analyses demonstrated upregulation of the known E2F1 target, Cyclin E; as well as of MCM7 and its resident miRNAs. D. ER-E2F1 expressing WI-38 cells were treated with 4-OHT (300nM) in combination with 80 g/ml of cycloheximide (CHX) for 4 hours. The levels of the polycistronic miRNAs were measured by QRT-PCR. Note that cycloheximide did not attenuate the induction of the miRs by 4-OHT, indicating that the transactivation of the miRs by E2F1 does not require the synthesis of a protein mediator. E. WI-38 cells were infected with the oncoprotein E1A or a control vector (Con) and QRT-PCR analysis was performed to measure the level of miR-155. F. Growth curves for control (empty vector) and miR-155 overexpressing cells. Both cell types displayed comparable growth rate and entered replicative senescence simultaneously. PDLs = Population Doublings. Data are represented as mean  $\pm$  SD.

## Figure S4

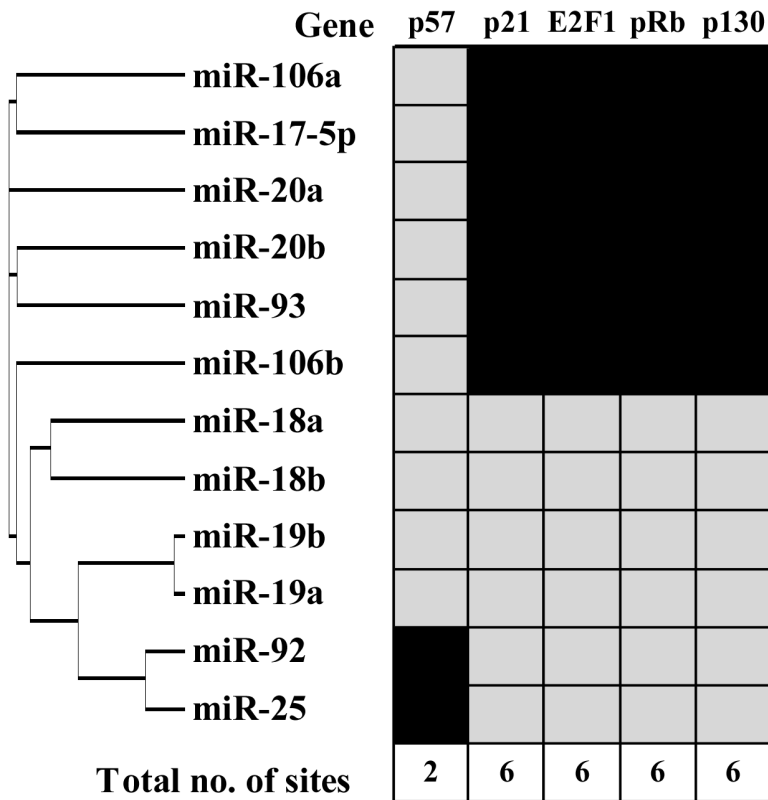

**Figure S4. miRNAs from the three paralogous polycistrons and their cell-cycle associated targets.**

Targeting of cell-cycle associated genes by miRNAs that belong to the miR-17-93, miR-106a-93 and miR-106b-25 polycistrons as predicted by PicTar. Black areas indicate predicted targeting.

# Figure S5

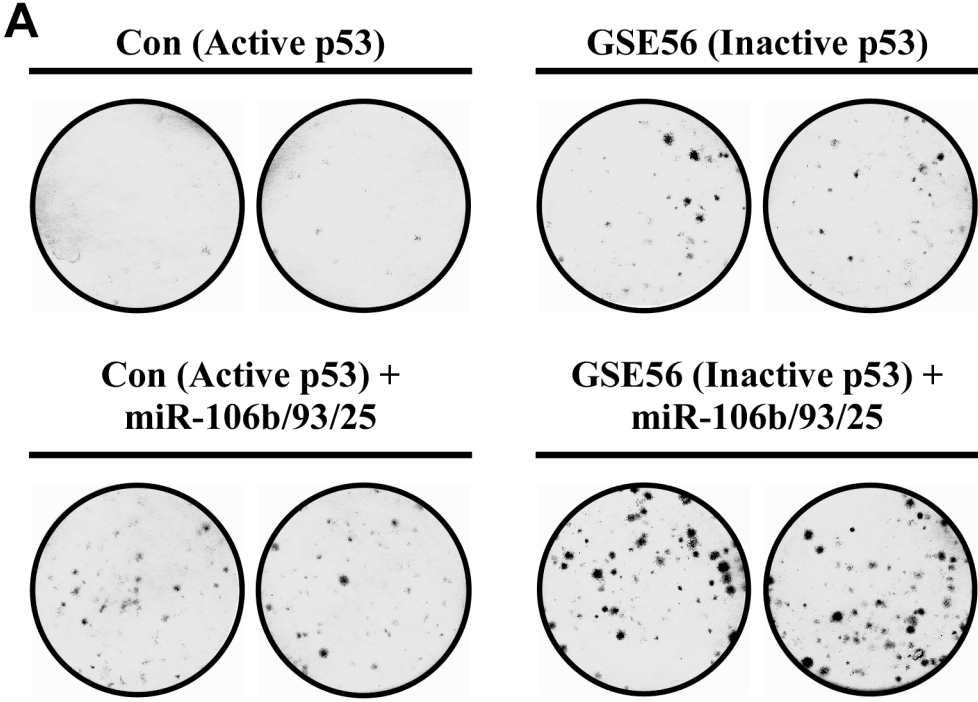

**B**

## Colony Formation Assay

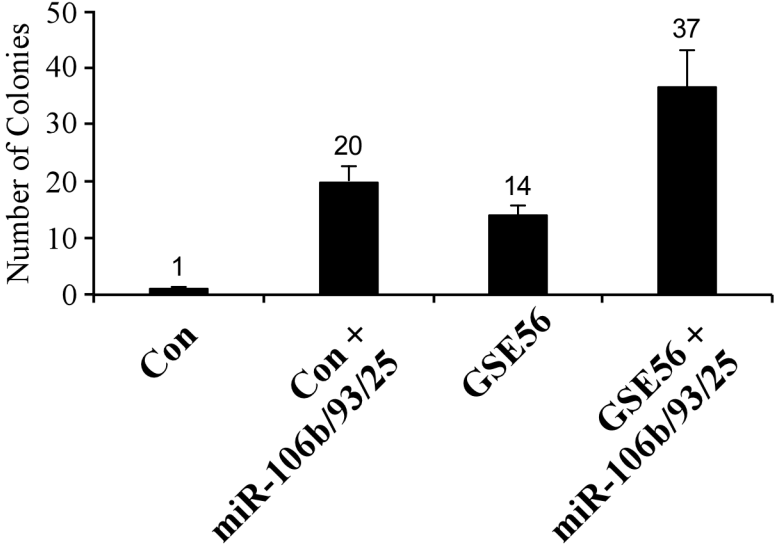



**Figure S5. Effect of miR-106b/93/25 on colony formation efficiency in WI-38 cells in the presence and absence of GSE56.**

WI-38 primary human fibroblasts were infected with a retrovirus encoding for the p53-inactivating peptide, GSE56. These cells and their active-p53 counterparts (Con) were infected with a retrovirus encoding for either the genomic region that contains miR-106b/93/25 or an empty vector control. After selection with the appropriate selection drug cells were plated (in duplicates) at low density and incubated for 10 days. A. Colonies were stained with crystal violet and plates were scanned. B. Colonies were counted. The average number of colonies (and standard deviation) for each condition are plotted. Note that the effect of miR-106b/93/25 overexpression in the control cells (that express an active p53) is more pronounced than in the GSE56-expressing cells.

## Figure S6

### correlations between microarray samples

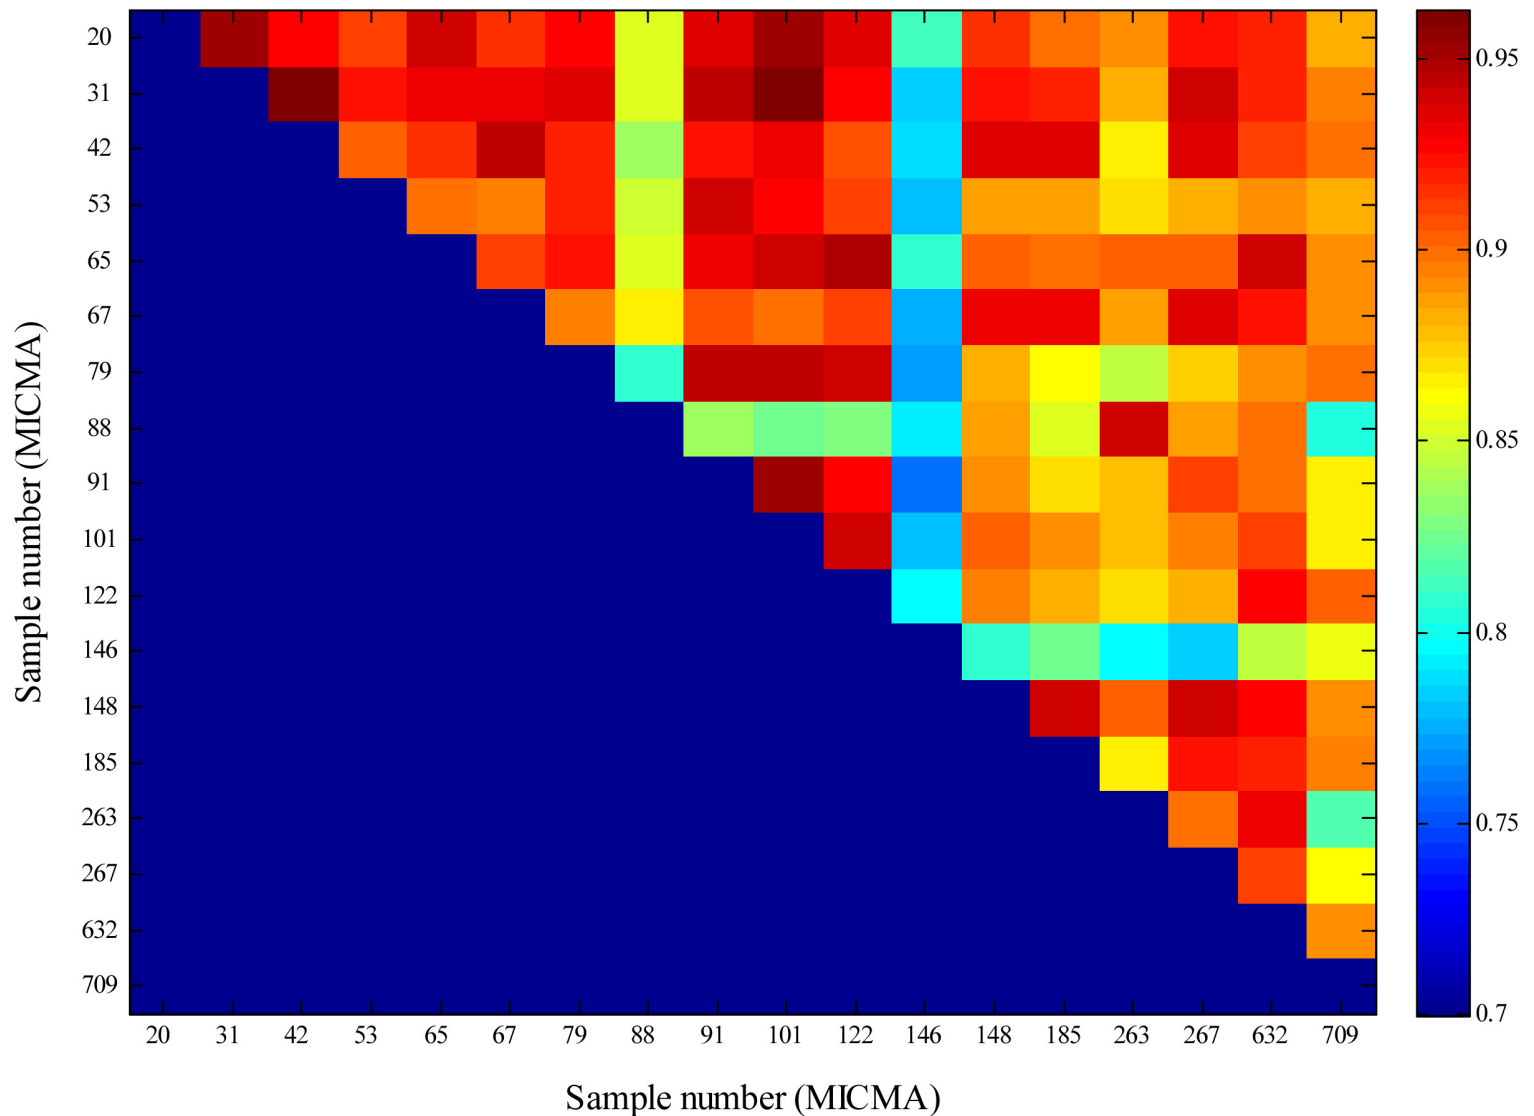

**Figure S6. Correlation coefficient between pairs of miRNA microarrays from the breast cancer study.**

Two samples, MICMA88 and MICMA146, were consistently more different from all other samples. Therefore, they were discarded from subsequent clustering analysis. These samples represent two out of 12 tumor samples with mutant p53.

**Table S1. Detailed description of TP53 gene mutations and expression subtypes of the 16 breast cancer samples**

Samples series: MicMa; Material: DNA, tumor; Method: Sequencing, TTGE; Region analysed: Exon 2-11; Reference sequence: NM\_095720.

| Sample ID | Expression Subgroup | TP53 status | Mutated Exon | Codon   | Codon Change      | Substitution | Mutation Type (predicted) | Codon 72 Polymorphism | Other variants, Polymorphism |
|-----------|---------------------|-------------|--------------|---------|-------------------|--------------|---------------------------|-----------------------|------------------------------|
| 31        | Basal like          | MUT         | 7            | 234     | TAC>TGC           | Tyr>Cys      | Missense                  | G/G Arg/Arg           |                              |
| 42        | Basal like          | MUT         | 7            | 248     | CGG>CAG           | Arg>Gln      | Missense                  | G/C Arg/Pro           | c213, CGA>CGG, Arg>Arg,het   |
| 53        | ERBB2               | MUT         | 5            | 141     | TGC>TAC           | Cys>Tyr      | Missense                  | G/G Arg/Arg           |                              |
| 67        | Basal like          | MUT         | 8            | 274     | GTT>TTT           | Val>Phe      | Missense                  | G/G Arg/Arg           |                              |
| 79        | ERBB2               | MUT         | 6            | 209     | Deletion of 2 bps |              | Frameshift                | G/G Arg/Arg           |                              |
| 91        | Luminal B           | MUT         | 9            |         | IVS9+1 G>A        |              | Splice                    | G/C Arg/Pro           | IVS4-29C>A,het               |
| 148       | Luminal B           | MUT         | 8            | 274     | GTT>GAT           | Val>Asp      | Missense                  | G/G Arg/Arg           |                              |
| 185       | Basal like          | MUT         | 5            | 173     | GTG>ATG           | Val>Met      | Missense                  | G/G Arg/Arg           |                              |
| 267       | Basal like          | MUT         | 6            | 213     | CGA>TGA           | Arg>Stop     | Nonsense                  | G/G Arg/Arg           |                              |
| 709       | Basal like          | MUT         | 6            | 195/196 | Deletion of 1 bp  |              | Frameshift                | G/C Arg/Pro           |                              |
| 20        | Normal like         | WT          |              |         |                   |              |                           | G/G Arg/Arg           |                              |
| 65        | Luminal A           | WT          |              |         |                   |              |                           | G/C Arg/Pro           |                              |
| 101       | Luminal A           | WT          |              |         |                   |              |                           | G/G Arg/Arg           |                              |
| 122       | Luminal A           | WT          |              |         |                   |              |                           | G/C Arg/Pro           |                              |
| 263       | Luminal A           | WT          |              |         |                   |              |                           | G/G Arg/Arg           |                              |
| 632       | Luminal A           | WT          |              |         |                   |              |                           | G/C Arg/Pro           |                              |

**Table S2. miRNAs that were co-clustered with mRNAs enriched for distinct functional annotations**

| Cell-Cycle                                                                                                                                                                                                                                                                                                                                            | Immune Response                                                     |
|-------------------------------------------------------------------------------------------------------------------------------------------------------------------------------------------------------------------------------------------------------------------------------------------------------------------------------------------------------|---------------------------------------------------------------------|
| miR-106a<br>miR-106b<br>miR-135b<br>miR-146a<br>miR-15b<br>miR-17-3p<br>miR-17-5p<br>miR-18a<br>miR-18b<br>miR-19a<br>miR-19b<br>miR-20a<br>miR-20b<br>miR-223<br>miR-25<br>miR-32<br>miR-362<br>miR-363<br>miR-454-3p<br>miR-500<br>miR-502<br>miR-532<br>miR-545<br>miR-576<br>miR-579<br>miR-590<br>miR-660<br>miR-9<br>miR-9*<br>miR-92<br>miR-93 | miR-142-3p<br>miR-142-5p<br>miR-146b<br>miR-150<br>miR-155<br>miR-7 |

**Table S3. Functional annotation enrichment analysis for clustered genes derived from breast cancer samples.**

| <b>A</b>                                     |                             |                           |
|----------------------------------------------|-----------------------------|---------------------------|
| <b>Functional Annotation Term</b>            | <b>No. of Cluster Genes</b> | <b>Enrichment P-Value</b> |
| Mitotic cell cycle                           | 39                          | 8.53E-20                  |
| Cell cycle                                   | 70                          | 1.11E-18                  |
| M phase                                      | 34                          | 2.62E-16                  |
| Mitosis                                      | 28                          | 3.13E-14                  |
| M phase of mitotic cell cycle                | 28                          | 4.39E-14                  |
| Cell division                                | 27                          | 1.37E-11                  |
| Chromosome segregation                       | 14                          | 2.63E-11                  |
| Regulation of progression through cell cycle | 40                          | 4.86E-09                  |
| Regulation of cell cycle                     | 40                          | 5.16E-09                  |
| Cell cycle checkpoint                        | 12                          | 2.20E-08                  |
| Cell proliferation                           | 41                          | 8.27E-08                  |
| Cytoskeleton organization and biogenesis     | 34                          | 1.09E-07                  |
| Organelle organization and biogenesis        | 53                          | 3.77E-07                  |
| DNA metabolism                               | 42                          | 8.93E-06                  |
| Phosphoinositide-mediated signaling          | 12                          | 1.76E-05                  |
| Mitotic sister chromatid segregation         | 7                           | 2.24E-05                  |
| Sister chromatid segregation                 | 7                           | 3.01E-05                  |
| Microtubule-based process                    | 17                          | 4.50E-05                  |
| Interphase of mitotic cell cycle             | 10                          | 5.62E-05                  |
| Interphase                                   | 10                          | 7.32E-05                  |
| Response to DNA damage stimulus              | 21                          | 8.10E-05                  |
| DNA-dependent DNA replication                | 12                          | 8.23E-05                  |
| Ectoderm development                         | 12                          | 9.08E-05                  |

**B**

| <b>Functional Annotation Term</b>            | <b>No. of Cluster Genes</b> | <b>Enrichment P-Value</b> |
|----------------------------------------------|-----------------------------|---------------------------|
| Immune response                              | 92                          | 1.24E-48                  |
| Response to biotic stimulus                  | 97                          | 2.12E-48                  |
| Defense response                             | 94                          | 5.36E-47                  |
| Response to pest, pathogen or parasite       | 56                          | 2.52E-32                  |
| Response to other organism                   | 56                          | 5.97E-31                  |
| Response to stimulus                         | 106                         | 1.08E-28                  |
| Organismal physiological process             | 99                          | 9.36E-27                  |
| Response to stress                           | 60                          | 4.50E-21                  |
| Response to virus                            | 17                          | 8.29E-15                  |
| Response to external stimulus                | 35                          | 1.23E-14                  |
| Response to wounding                         | 30                          | 9.15E-14                  |
| Humoral immune response                      | 20                          | 7.40E-13                  |
| Inflammatory response                        | 20                          | 6.76E-11                  |
| Chemotaxis                                   | 16                          | 1.20E-10                  |
| Taxis                                        | 16                          | 1.20E-10                  |
| Locomotory behavior                          | 16                          | 2.10E-10                  |
| Regulation of apoptosis                      | 24                          | 4.29E-10                  |
| Regulation of programmed cell death          | 24                          | 4.80E-10                  |
| Humoral defense mechanism                    | 15                          | 5.97E-10                  |
| Antimicrobial humoral response               | 13                          | 2.77E-09                  |
| Cell death                                   | 29                          | 4.28E-09                  |
| Death                                        | 29                          | 4.96E-09                  |
| Apoptosis                                    | 28                          | 8.01E-09                  |
| Programmed cell death                        | 28                          | 8.63E-09                  |
| Behavior                                     | 17                          | 9.69E-09                  |
| Antimicrobial humoral response               | 12                          | 2.03E-08                  |
| Calcium ion homeostasis                      | 11                          | 6.99E-08                  |
| Response to chemical stimulus                | 22                          | 7.35E-08                  |
| Response to abiotic stimulus                 | 23                          | 1.84E-07                  |
| Lymphocyte activation                        | 11                          | 4.28E-07                  |
| Cell communication                           | 79                          | 5.67E-07                  |
| Signal transduction                          | 74                          | 8.96E-07                  |
| Cellular defense response                    | 11                          | 1.33E-06                  |
| Di-, tri-valent inorganic cation homeostasis | 11                          | 2.04E-06                  |
| Immune cell activation                       | 11                          | 2.22E-06                  |
| Cell activation                              | 11                          | 2.41E-06                  |
| Metal ion homeostasis                        | 11                          | 3.88E-06                  |
| Induction of programmed cell death           | 12                          | 4.01E-06                  |

**Table S4. Conserved E2F sites predictions upstream of the three miRNA polycistrons**

Predicted E2F sites were searched for in the genomic region spanning up to 10,000 bps upstream of the first miRNA in each polycistron (i.e. miR-17-5p, miR-106b and miR-106a), using the *tfbsConsSites database* (UCSC, human genome version hg17).

| miRNA Polycistron | Chr | Site name          | Position-Specific Scoring Matrix (PSSM) | Distance Upstream of first miRNA in the polycistron | Distance upstream from Primary Transcript/Host TSS | Site Sequence    |
|-------------------|-----|--------------------|-----------------------------------------|-----------------------------------------------------|----------------------------------------------------|------------------|
| hsa-mir-17-92     | 13  | miR-17-92 site 1   | V\$E2F_Q3                               | 2868                                                | 83                                                 | CCTTCGCGC        |
| hsa-mir-106b-25   | 7   | miR-106b-25 site 1 | V\$E2F_01                               | 7513                                                | 814                                                | ACCGCGGGAAACCCGG |
| hsa-mir-106b-25   | 7   | miR-106b-25 site 2 | V\$E2F_01                               | 7336                                                | 637                                                | GACGTTTCGCGCCAAT |
| hsa-mir-106b-25   | 7   | miR-106b-25 site 3 | V\$E2F4DP2_01                           | 6821                                                | 129                                                | GTTCCCGCG        |
| hsa-mir-106a-92   | X   | miR-106a-92 site 1 | V\$E2F_Q3                               | 3798                                                | no known primary transcript                        | CTTCGCGCC        |

**Table S5. Mutual targets of E2F transactivation and miR-106b/93/25 silencing**

The list of E2F targets was compiled from a combination of seven high-throughput studies designed to identify E2F target genes (Ishida et al., 2001; Ma et al., 2002; Muller et al., 2001; Polager et al., 2002; Ren et al., 2002; Stanelle et al., 2002; Weinmann et al., 2001). Prediction of miRNA sites was performed using PicTar (Krek et al., 2005).

| RefSeq    | Symbol  | Name                                           | PicTar predicted sites |          |        |
|-----------|---------|------------------------------------------------|------------------------|----------|--------|
| NM_000076 | CDKN1C  | cyclin-dependent kinase inhibitor 1C           | miR-25                 |          |        |
| NM_000321 | RB1     | retinoblastoma 1                               | miR-93                 | miR-106b |        |
| NM_001124 | ADM     | adrenomedullin                                 | miR-25                 |          |        |
| NM_001386 | DPYSL2  | dihydropyrimidinase-like 2                     | miR-93                 | miR-106b |        |
| NM_001396 | DYRK1A  | dual-specificity tyrosine-(Y)-phosphorylation  | miR-93                 | miR-106b |        |
| NM_001430 | EPAS1   | endothelial PAS domain protein 1               | miR-93                 | miR-106b |        |
| NM_001450 | FHL2    | four and a half LIM domains 2 isoform 1        | miR-25                 |          |        |
| NM_001753 | CAV1    | caveolin 1                                     | miR-106b               |          |        |
| NM_001769 | CD9     | CD9 antigen                                    | miR-25                 |          |        |
| NM_001949 | E2F3    | E2F transcription factor 3                     | miR-93                 | miR-106b | miR-25 |
| NM_002024 | FMR1    | fragile X mental retardation 1                 | miR-25                 |          |        |
| NM_002499 | NEO1    | neogenin homolog 1                             | miR-93                 |          |        |
| NM_003016 | SFRS2   | splicing factor, arginine/serine-rich 2        | miR-93                 | miR-106b |        |
| NM_003139 | SRPR    | signal recognition particle receptor ('docking | miR-25                 |          |        |
| NM_003272 | TM7SF1  | transmembrane 7 superfamily member 1           | miR-106b               |          |        |
| NM_003505 | FZD1    | frizzled 1                                     | miR-106b               |          |        |
| NM_003954 | MAP3K14 | mitogen-activated protein kinase kinase kinase | miR-93                 | miR-106b |        |
| NM_004036 | ADCY3   | adenylate cyclase 3                            | miR-25                 |          |        |
| NM_004354 | CCNG2   | cyclin G2                                      | miR-93                 | miR-106b |        |



|           |          |                                                 |          |          |        |
|-----------|----------|-------------------------------------------------|----------|----------|--------|
| NM_004364 | CEBPA    | CCAAT/enhancer binding protein alpha            | miR-25   |          |        |
| NM_004844 | SH3BP5   | SH3-domain binding protein 5 (BTK-associated)   | miR-93   | miR-106b |        |
| NM_005197 | CHES1    | checkpoint suppressor 1                         | miR-106b |          |        |
| NM_005458 | GPR51    | G protein-coupled receptor 51                   | miR-106b |          |        |
| NM_005596 | NFIB     | nuclear factor I/B                              | miR-93   | miR-25   |        |
| NM_005779 | LHFPL2   | lipoma HMGIC fusion partner-like 2              | miR-25   |          |        |
| NM_005923 | MAP3K5   | mitogen-activated protein kinase kinase kinase  | miR-93   | miR-106b |        |
| NM_006195 | PBX3     | pre-B-cell leukemia transcription factor 3      | miR-106b |          |        |
| NM_006352 | ZNF238   | zinc finger protein 238 isoform 2               | miR-93   | miR-106b |        |
| NM_006482 | DYRK2    | dual-specificity tyrosine-(Y)-phosphorylation   | miR-93   | miR-25   |        |
| NM_006751 | SSFA2    | sperm specific antigen 2                        | miR-93   | miR-106b | miR-25 |
| NM_006806 | BTG3     | B-cell translocation gene 3                     | miR-93   | miR-106b |        |
| NM_012334 | MYO10    | myosin X                                        | miR-106b |          |        |
| NM_014344 | FJX1     | four jointed box 1                              | miR-93   | miR-106b |        |
| NM_014679 | KIAA0092 | translokin                                      | miR-93   | miR-106b |        |
| NM_014876 | KIAA0063 | KIAA0063 gene product                           | miR-93   | miR-106b | miR-25 |
| NM_015008 | KIAA0779 | KIAA0779 protein                                | miR-93   | miR-106b |        |
| NM_015678 | NBEA     | neurobeachin                                    | miR-93   | miR-106b |        |
| NM_016131 | RAB10    | ras-related GTP-binding protein RAB10           | miR-93   | miR-106b |        |
| NM_016357 | EPLIN    | epithelial protein lost in neoplasm beta        | miR-93   | miR-106b |        |
| NM_017803 | FLJ20399 | hypothetical protein FLJ20399                   | miR-25   |          |        |
| NM_021005 | NR2F2    | nuclear receptor subfamily 2, group F, member 2 | miR-106b |          |        |
| NM_053056 | CCND1    | cyclin D1                                       | miR-93   | miR-106b |        |
| NM_057749 | CCNE2    | cyclin E2 isoform 1                             | miR-106b | miR-25   |        |
| NM_145725 | TRAF3    | TNF receptor-associated factor 3 isoform 1      | miR-25   |          |        |
| NM_153719 | NUP62    | nucleoporin 62kDa                               | miR-93   |          |        |

|           |          |                                                 |          |          |        |
|-----------|----------|-------------------------------------------------|----------|----------|--------|
| NM_173075 | APBB2    | amyloid beta A4 precursor protein-binding,      | miR-93   | miR-106b |        |
| NM_173173 | NR4A2    | nuclear receptor subfamily 4, group A, member 2 | miR-93   | miR-106b |        |
| NM_173200 | NR4A3    | nuclear receptor subfamily 4, group A, member 3 | miR-93   | miR-106b | miR-25 |
| NM_174886 | TGIF     | TG-interacting factor isoform d                 | miR-25   |          |        |
| NM_181659 | NCOA3    | nuclear receptor coactivator 3 isoform a        | miR-93   | miR-106b |        |
| NM_182744 | NBL1     | neuroblastoma, suppression of tumorigenicity 1  | miR-93   | miR-106b |        |
| NM_183384 | RNF13    | ring finger protein 13 isoform 3                | miR-106b |          |        |
| NM_197968 | ZNF198   | zinc finger protein 198                         | miR-93   |          |        |
| NM_198966 | PTH1H    | parathyroid hormone-like hormone isoform 1      | miR-93   | miR-106b |        |
| NM_199334 | THRA     | thyroid hormone receptor, alpha isoform 1       | miR-93   | miR-106b |        |
| NM_024322 | MGC11266 | hypothetical protein MGC11266                   | miR-93   | miR-106b |        |

- Ishida, S., Huang, E., Zuzan, H., Spang, R., Leone, G., West, M., and Nevins, J.R. (2001). Role for E2F in control of both DNA replication and mitotic functions as revealed from DNA microarray analysis. *Mol Cell Biol* *21*, 4684-4699.
- Krek, A., Grun, D., Poy, M.N., Wolf, R., Rosenberg, L., Epstein, E.J., MacMenamin, P., da Piedade, I., Gunsalus, K.C., Stoffel, M., *et al.* (2005). Combinatorial microRNA target predictions. *Nat Genet* *37*, 495-500.
- Ma, Y., Croxton, R., Moorer, R.L., Jr., and Cress, W.D. (2002). Identification of novel E2F1-regulated genes by microarray. *Arch Biochem Biophys* *399*, 212-224.
- Muller, H., Bracken, A.P., Vernell, R., Moroni, M.C., Christians, F., Grassilli, E., Prosperini, E., Vigo, E., Oliner, J.D., and Helin, K. (2001). E2Fs regulate the expression of genes involved in differentiation, development, proliferation, and apoptosis. *Genes Dev* *15*, 267-285.
- Polager, S., Kalma, Y., Berkovich, E., and Ginsberg, D. (2002). E2Fs up-regulate expression of genes involved in DNA replication, DNA repair and mitosis. *Oncogene* *21*, 437-446.
- Ren, B., Cam, H., Takahashi, Y., Volkert, T., Terragni, J., Young, R.A., and Dynlacht, B.D. (2002). E2F integrates cell cycle progression with DNA repair, replication, and G(2)/M checkpoints. *Genes Dev* *16*, 245-256.
- Stanelle, J., Stiewe, T., Theseling, C.C., Peter, M., and Putzer, B.M. (2002). Gene expression changes in response to E2F1 activation. *Nucleic Acids Res* *30*, 1859-1867.
- Weinmann, A.S., Bartley, S.M., Zhang, T., Zhang, M.Q., and Farnham, P.J. (2001). Use of chromatin immunoprecipitation to clone novel E2F target promoters. *Mol Cell Biol* *21*, 6820-6832.

**Table S6A. Primers used for quantification of mRNA levels (using QRT-PCR).**

| <b>Gene Symbol , RefSeq No.</b> | <b>Forward Primer<br/>(5' to 3')</b> | <b>Reverse Primer<br/>(5' to 3')</b> |
|---------------------------------|--------------------------------------|--------------------------------------|
| GAPDH, NM_002046                | agcctcaagatcatcagcaatg               | cacgataccaaagttgcatggat              |
| MCM7, NM_005916                 | tctggcacgtctgagaatggt                | acggacggtggcaaatatca                 |
| C13ORF25                        | gaagatggtggcggtactc                  | ggtgcagttaggtccacgtgtat              |
| E2F1, NM_005225                 | ccatccaggaaaaggtgtgaa                | agcgcttgggtggtcagattc                |
| CCNE1 (Cyclin E), NM_001238     | tttaccctcaactcaacgtgcaa              | tggagacctaccacgttatta                |
| CDKN1A (p21), NM_078467         | cgcgactgtgatgcgctaatg                | ggaacctctcattcaaccgcc                |
| CDKN1C (p57), NM_000076         | gaacgccgaggaccagaac                  | ggcatgtcctgctggaagtc                 |
| RBL2 (p130), NM_005611          | caagcaacctcagccttcca                 | ttctctccatctaaagttaccgaaga           |
| CDC20, NM_001255                | gagggtggctgggttctct                  | cagatgcgaatgtgcatca                  |
| BIC                             | tgtgcgagcagagaatctacctt              | tggaggaagaacaggcttagaa               |

**Table S6B. Primers used for CHIP analysis (using QRT-PCR).**

| <b>Primer pair name</b>      | <b>Forward Primer<br/>(5' to 3')</b> | <b>Reverse Primer<br/>(5' to 3')</b> |
|------------------------------|--------------------------------------|--------------------------------------|
| miR-106b-25 sites 1-2        | gtgattggcttgcggetag                  | caatcggacaaggcgge                    |
| miR-106b-25 site 3           | tcttaagggtctgggctcc                  | ggaatgcccaaaagcgc                    |
| miR-17-92                    | tttatgctaagagggagtggg                | gctcccgcctcaacgtaa                   |
| miR-106a-92                  | gctgcagctgtaggacacaattaat            | gctacatccgctcctcacaaa                |
| $\beta$ -actin               | actggctcgtgtgacaaggc                 | cactccaaggccgctttaca                 |
| $\beta$ -tubulin (NM_177987) | ggagctgatggagtcatgatg                | cagctctcagcctcctttctg                |
